# Supplementary material for: Subnanometer-resolution structure determination in situ by hybrid subtomogram averaging - single particle cryo-EM
Source: Springer Nature journal article supplement (doi:10.1038/s41467-020-17466-0), 2020-07-24
Supplement: MOESM3 [file 41467_2020_17466_MOESM3_ESM.pdf]

## **Description of Additional Supplementary Files**

File Name: Supplementary Movie 1

Description: Slices through a tomogram of native SR vesicles used in Figure 4 and Supplementary Figure 1. The width of the tomogram is 700 nm, it has been binned by a factor of four and subjected to ten iterations of non-linear anisotropic diffusion.
